# Supplementary material for: Temperature-dependent photoluminescence of cadmium-free Cu–Zn–In–S quantum dot thin films as temperature probes
Source: Royal Society of Chemistry journal article supplement (doi:10.1039/c5dt03821a), 2015-01-01
Supplement: c5dt03821a1.pdf [file c5dt03821a1.pdf]

## Electronic Supplementary Information

### **Temperature-Dependent Photoluminescence of Cadmium-Free Cu-Zn-In-S Quantum Dot Thin Films as Temperature Probes**

Lan Wang, Xiaojiao Kang, Lijian Huang, Daocheng Pan\*

*State Key Laboratory of Rare Earth Resource Utilization, Changchun Institute of Applied  
Chemistry, Chinese Academy of Sciences, Changchun, Jilin, 130022, China*

Tel & fax: +86-431-85262941; email: pan@ciac.ac.cn

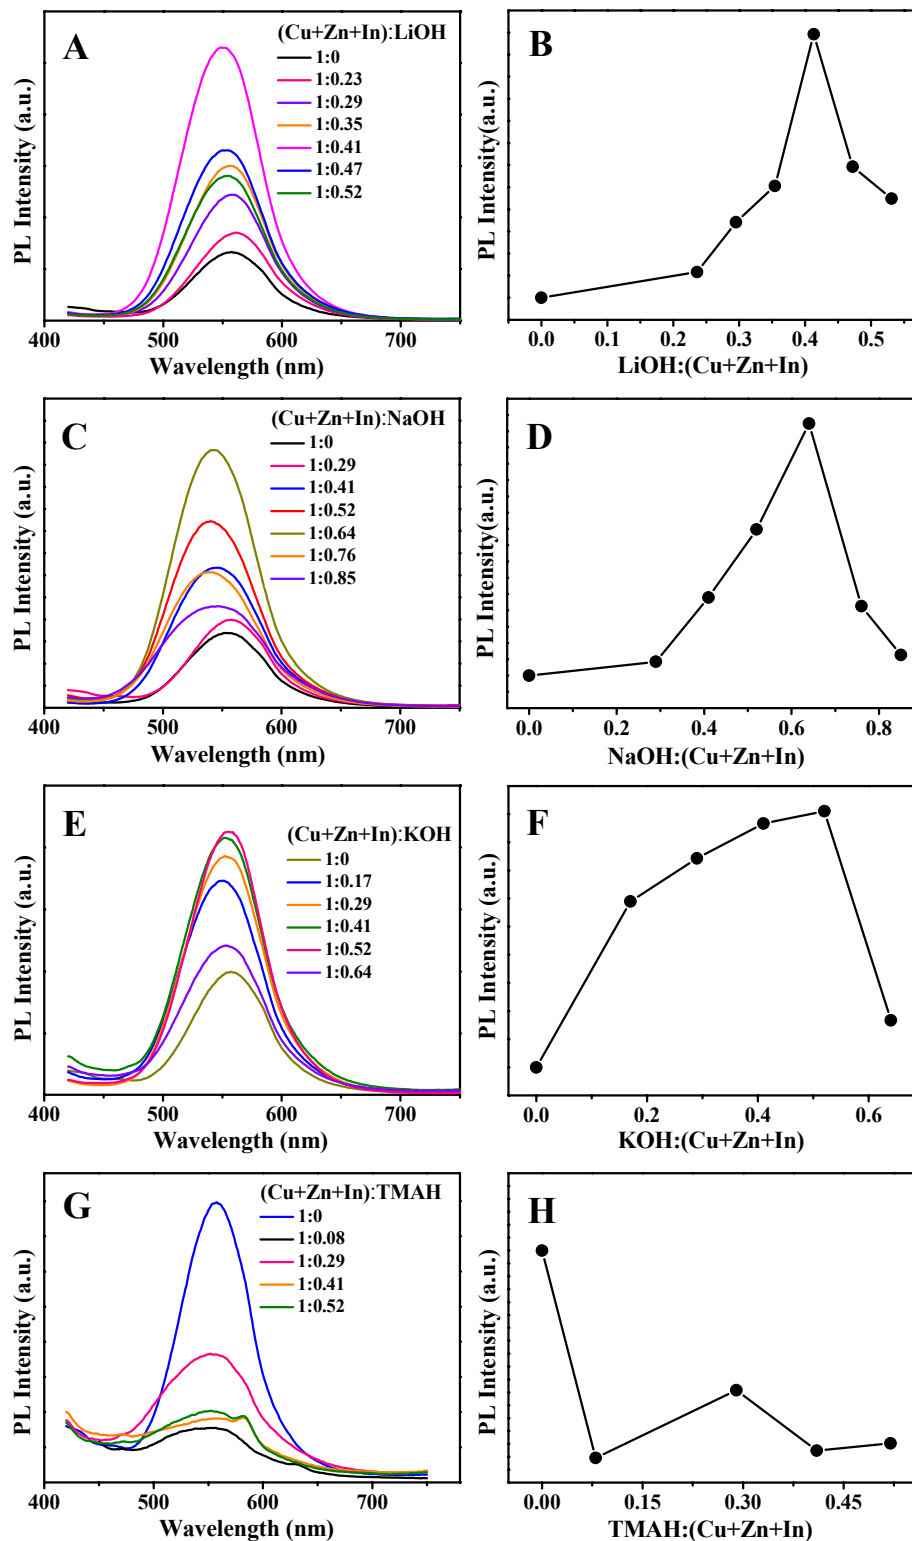

**Figure S1.** Effects of LiOH (A and B), NaOH (C and D), KOH (E and F), and TMAH (G and H) on PL spectra and PL intensity of Cu-Zn-In-S QD thin films with different Cu/Zn/In ratios.

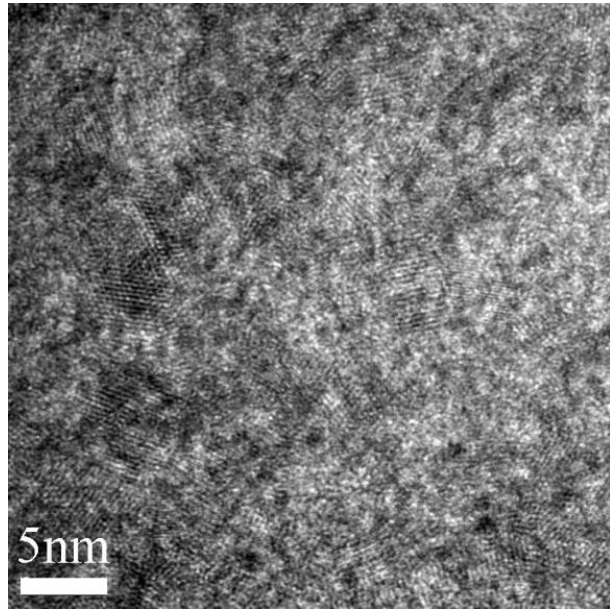

**Figure S2.** HRTEM image of Cu-Zn-In-S QDs (Cu:Zn:In=1:10:10)

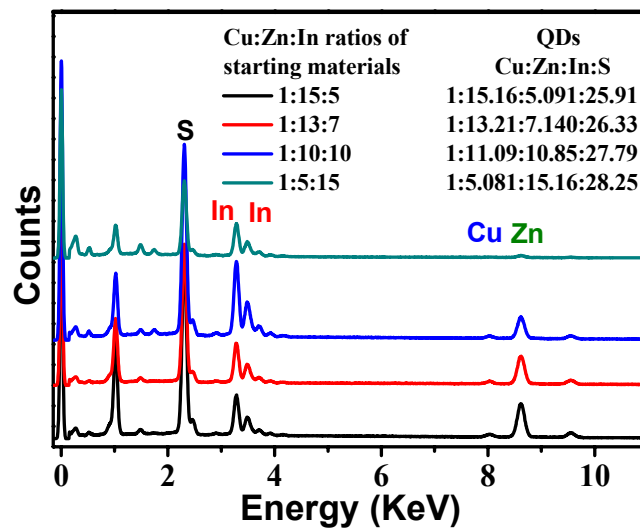

**Figure S3.** EDS spectra and chemical compositions of Cu-Zn-In-S QD thin films with different Cu:Zn:In ratios

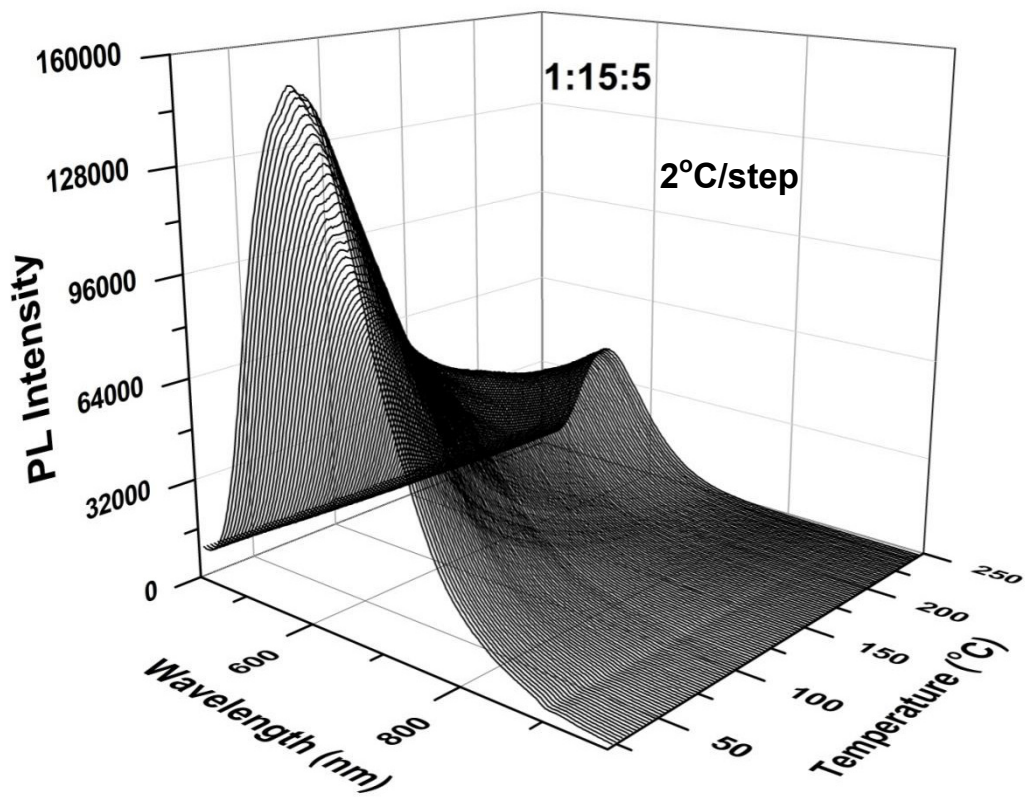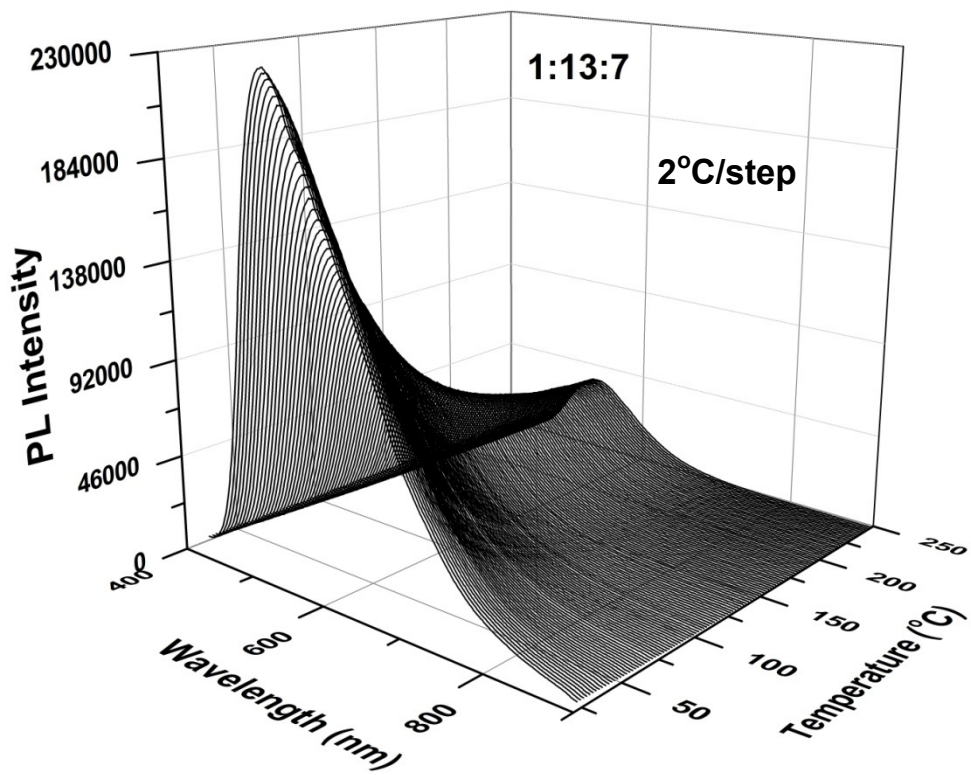

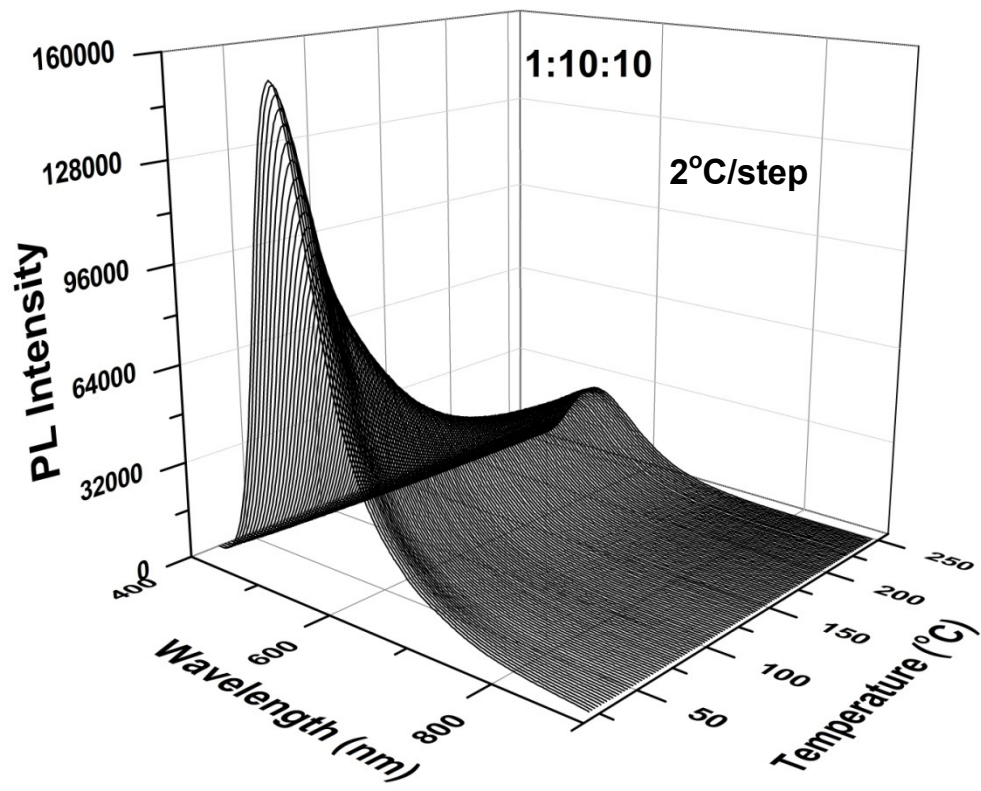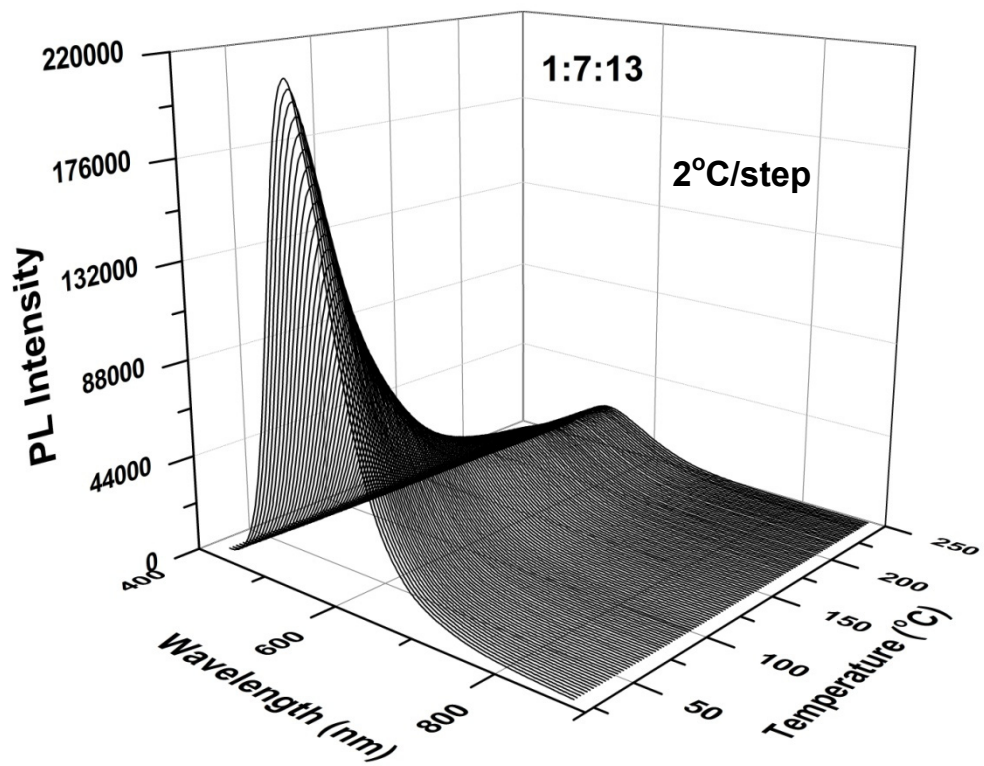

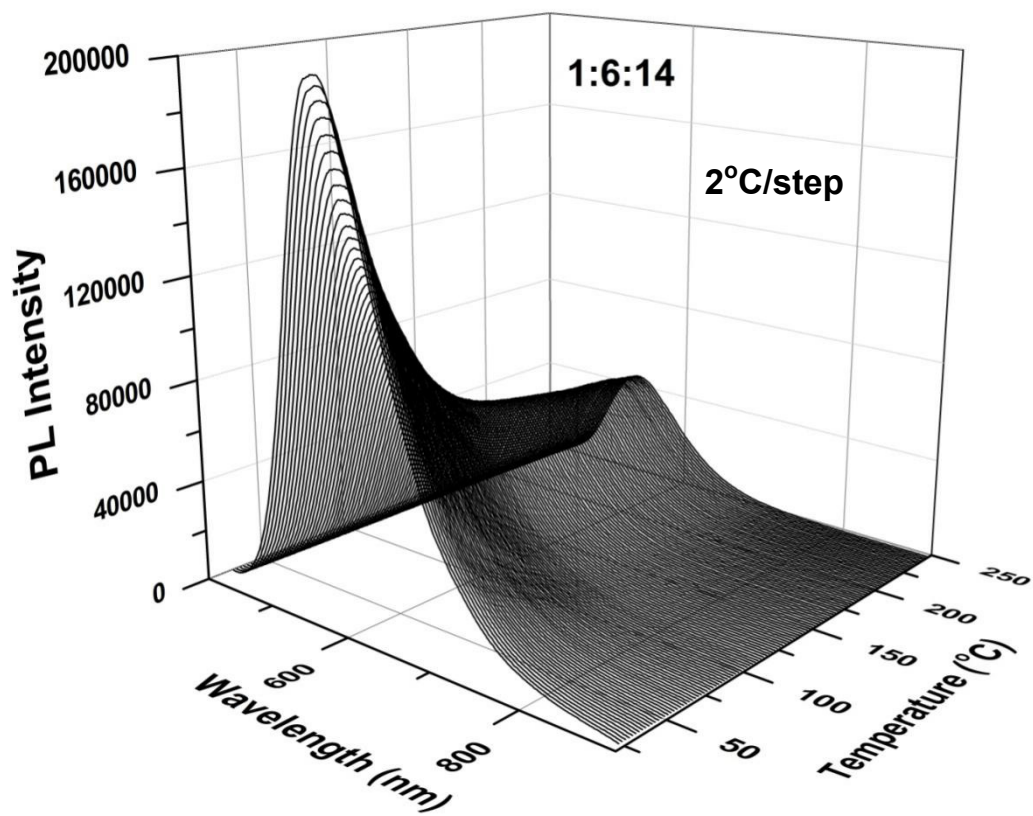

**Figure S4.** Temperature-dependent PL spectra of Cu-Zn-In-S QD thin films with different Cu/Zn/In ratios.
